## Correction: IGF-1R, a target of let-7b, mediates crosstalk between IRS-2/Akt and MAPK pathways to promote proliferation of oral squamous cell carcinoma

Ling Gao<sup>1,2</sup>, Xiaolong Wang<sup>1</sup>, Xiaofei Wang<sup>2</sup>, Linmei Zhang<sup>1</sup>, Cui Qiang<sup>1</sup>, Su'e Chang<sup>2</sup>, Wenhao Ren<sup>1</sup>, Shaoming Li<sup>1</sup>, Yang Yang<sup>2</sup>, Dongdong Tong<sup>2</sup>, Cheng Chen<sup>1</sup>, Zongfang Li<sup>3</sup>, Tusheng Song<sup>2</sup>, Keqian Zhi<sup>1</sup> and Chen Huang<sup>2</sup>

<sup>1</sup>Department of Oral Maxillofacial Surgery, Stomatology Hospital of Xi'an Jiaotong University College of Medicine, Xi'an, Shaanxi, P. R. China

<sup>2</sup>Key Laboratory of Environment and Genes Related to Diseases, College of Medicine, Xi'an Jiaotong University, Xi'an, Shaanxi, P. R. China

<sup>3</sup>Department of General Surgery, the Second Affiliated Hospital, School of Medicine, Xi'an Jiaotong University, Xi'an, Shaanxi, P. R. China

### Published:

**Copyright:** © 2023 Gao et al. This is an open access article distributed under the terms of the [Creative Commons Attribution License](#) (CC BY 3.0), which permits unrestricted use, distribution, and reproduction in any medium, provided the original author and source are credited.

**This article has been corrected:** In Figure 4B, the 'anti-let-7b' and 'anti-let-7b-ctrl' images are accidental duplicates of the micrograph images of 'si-Ctrl' and 'si-IGF-1R#1' in Figure 5E. The corrected Figure 4B, produced using the original data, is shown below. The authors declare that these corrections do not change the results or conclusions of this paper.

Original article: Oncotarget. 2014; 5:2562–2574. <https://doi.org/10.18632/oncotarget.1812>

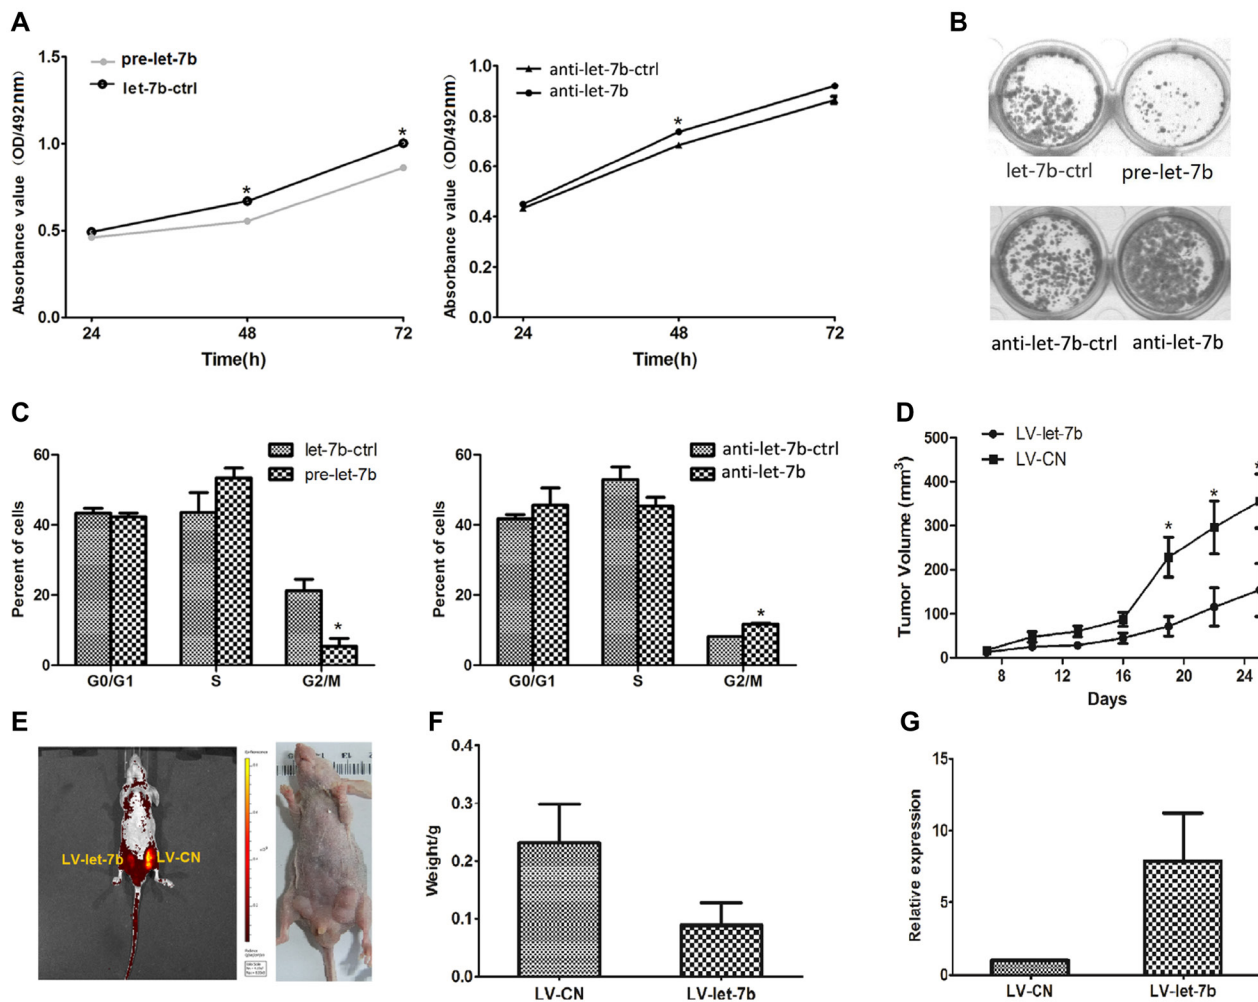

**Figure 4: IGF-1R and IRS-2-mediated let-7b inhibited OSCC cell growth *in vitro* and *in vivo*.** (A) At 24, 48 and 72 h after transfection with pre-let-7b, let-7b-ctrl, anti-let-7b or anti-let-7b ctrl, cell proliferation was examined by the MTT assay. All data were shown as mean  $\pm$  SEM. \* $P < 0.05$ , \*\* $P < 0.01$ . (B) Representative micrographs of crystal violet-stained cell colonies were analyzed by colony formation assay at day 15 after transfection. (C) The histograms for cell-cycle distribution of Tca-8113 cells transfected with miRNAs for 24 h based on the flow-cytometric analysis, data were presented as mean  $\pm$  SEM. \* $P < 0.05$ . (D) Tca-8113 cells were infected with LV-let-7b and LV-CN injected s.c. into nude mice, growth curve of tumor volume was formed every 3 days for 18 days ( $n = 10$ ). Each data point represented mean  $\pm$  SEM. (E) At day 25, tumor growth was measured by *in vivo* bioluminescence imaging. (F) The mice were anesthetize and sacrificed at the experimental endpoint and tumors infected with LV-let-7b and LV-CN were weighted at day 25 after the initial injection. Data were represented as mean  $\pm$  SEM. (G) Levels of let-7b expression in tumor xenografts were quantified by qRT-PCR. Each data point represented mean  $\pm$  SEM. \* $P < 0.05$ .
